# Supplementary material for: Lipidomic profile of meningiomas harboring different NF2 mutation status
Source: Research Square preprint supplement (doi:10.21203/rs.3.rs-6490941/v1), 2025-04-29
Supplement: Supplementary file 1 [file 92dfd2bff283c3ad34d0851b.docx]

**Lipidomic profile of meningiomas harboring different NF2 mutation status**

Joanna Bogusiewicz1, Ivana Stanimirova2, Magdalena Gaca-Tabaszewska1, Paulina Szeliska1, Krystyna Soszyńska3, Anna Majdańska3, Agata Ryfa3, Alicja Bartoszewska-Kubiak3, Jacek Furtak4,5, Marcin Birski5, Marek Harat4,5*, Barbara Bojko1*

1 Department of Pharmacodynamics and Molecular Pharmacology, Faculty of Pharmacy, Collegium Medicum

in Bydgoszcz, Nicolaus Copernicus University in Torun, 85-089 Bydgoszcz, Poland

2 Institute of Chemistry, University of Silesia in Katowice, 40-006 Katowice, Poland

3 Laboratory of Clinical Genetics and Molecular Pathology, Department of Pathology, 10th Military Research

Hospital and Polyclinic, Bydgoszcz, Poland, 85-681 Bydgoszcz, Poland

4 Medical Faculty, Bydgoszcz University of Science and Technology, 85-796 Bydgoszcz, Poland

5 Department of Neurosurgery, 10th Military Research Hospital and Polyclinic, 85-681 Bydgoszcz, Poland

Corresponding authors:

Professor Barbara Bojko, Department of Pharmacodynamics and Molecular Pharmacology, Faculty of Pharmacy, Collegium Medicum in Bydgoszcz, Nicolaus Copernicus University in Torun, Jurasza 2, 85-089 Bydgoszcz, Poland; [bbojko@cm.umk.pl](mailto:bbojko@cm.umk.pl)

Professor Marek Harat; Department of Neurosurgery, 10th Military Research Hospital and Polyclinic, Powstańców Warszawy 5, 85-681 Bydgoszcz, Poland; [harat@10wsk.mil.pl](mailto:harat@10wsk.mil.pl)

SUPPLEMENTARY MATERIALS

Table S1

Details on patients included in the study

AP – meningioma anaplasticum, AT – meningioma atypicum, F – female, M – male, MA – meningioma angiomatous, MM/MA – meningioma meningiotheliae – angiomatous, MF – meningioma fibrosum, MF/MP – meningioma fibrosum – psammomamatosum, MM – meningioma meningiotheliae, MM/MF – meningioma meningiotheliae – fibrosum, MM/MP – meningioma meningiotheliae – psammomamatosum, MP – meningioma psammomamatosum, mut – mutant, wt – wildtype

| LP | AGE | SEX | HISTOLOGY | GRADE | NF |
| --- | --- | --- | --- | --- | --- |
| 8 | 40 | F | MF/MP | 1 | mt |
| 10 | 58 | F | MF | 1 | mt |
| 11 | 59 | F | MF | 1 | mt |
| 16 | 30 | F | MA | 1 | mt |
| 18 | 79 | F | MM | 1 | mt |
| 24 | 56 | F | MP | 1 | mt |
| 26 | 65 | F | MF | 1 | mt |
| 28 | 56 | F | MF | 1 | mt |
| 31 | 51 | F | MM/MP | 1 | mt |
| 33 | 65 | F | MF | 1 | mt |
| 36 | 53 | F | MP | 1 | mt |
| 43 | 66 | M | MP | 1 | mt |
| 52 | 57 | F | MP | 1 | mt |
| 56 | 80 | M | MM | 1 | mt |
| 57 | 49 | F | MM | 1 | mt |
| 59 | 62 | F | MP | 1 | mt |
| 65 | 64 | M | MM | 1 | mt |
| 67 | 39 | F | MM | 1 | mt |
| 68 | 61 | F | AT | 2 | mt |
| 69 | 66 | F | MP | 1 | mt |
| 70 | 56 | M | MM | 1 | mt |
| 75 | 55 | F | MF | 1 | mt |
| 82 | 56 | F | MF | 1 | mt |
| 95 | 54 | F | MP | 1 | mt |
| 98 | 72 | F | AP | 3 | mt |
| 103 | 55 | F | MM | 1 | mt |
| 105 | 41 | F | MM/MP | 1 | mt |
| 106 | 70 | F | MM/MP | 1 | mt |
| 109 | 64 | M | MM/MF | 1 | mt |
| 115 | 76 | F | MF | 1 | mt |
| 119 | 80 | F | MM/MF | 1 | mt |
| 126 | 52 | F | MM | 1 | mt |
| 134 | 69 | F | MM | 1 | mt |
| 140 | 44 | F | MM | 1 | mt |
| 142 | 52 | F | MM/MF | 1 | mt |
| 147 | 59 | F | MF/MP | 1 | mt |
| 148 | 63 | F | MM | 1 | mt |
| 152 | 56 | F | MF | 1 | mt |
| 153 | 54 | F | MF | 1 | mt |
| 167 | 70 | M | MM | 1 | mt |
| 169 | 39 | F | MM/MF | 1 | mt |
| 171 | 74 | F | MP | 1 | mt |
| 172 | 62 | F | MF/MP | 1 | mt |
| 173 | 71 | M | MM | 1 | mt |
| 174 | 56 | F | MM/MF | 1 | mt |
| 178 | 69 | M | MM/MF | 1 | mt |
| 184 | 60 | F | MF | 1 | mt |
| 192 | 61 | F | MF | 1 | mt |
| 198 | 67 | F | MF | 1 | mt |
| 201 | 40 | F | MM | 1 | mt |
| 5 | 60 | F | MM | 1 | wt |
| 9 | 43 | F | MM | 1 | wt |
| 15 | 40 | M | MM | 1 | wt |
| 23 | 63 | F | MM | 1 | wt |
| 29 | 72 | M | MM | 1 | wt |
| 32 | 59 | M | MF | 1 | wt |
| 34 | 69 | M | MM | 1 | wt |
| 53 | 63 | F | MM/MA | 1 | wt |
| 81 | 52 | F | MM | 1 | wt |
| 83 | 66 | M | MM/MP | 1 | wt |
| 84 | 57 | F | MP | 1 | wt |
| 85 | 59 | F | MM | 1 | wt |
| 89 | 31 | F | MM/MF | 1 | wt |
| 97 | 44 | F | MP | 1 | wt |
| 101 | 59 | F | MM | 1 | wt |
| 107 | 58 | M | MA | 1 | wt |
| 114 | 65 | F | MM | 1 | wt |
| 118 | 48 | M | MM | 1 | wt |
| 121 | 43 | M | AT | 2 | wt |
| 123 | 43 | F | MM | 1 | wt |
| 127 | 67 | F | MM | 1 | wt |
| 159 | 40 | F | MM | 1 | wt |
| 161 | 39 | F | MM | 1 | wt |
| 163 | 54 | F | MM | 1 | wt |
| 168 | 59 | F | MM | 1 | wt |
| 175 | 41 | M | MM | 1 | wt |
| 182 | 73 | F | MM | 1 | wt |
| 189 | 74 | F | MM | 1 | wt |
| 190 | 69 | M | MM/MP | 1 | wt |
| 195 | 69 | F | MM/MP | 1 | wt |
| 202 | 45 | F | MM | 1 | wt |

Table S2 The list of lipid species detected using Hp

| Analyte | Adduct | m/z | RT | NF2wt | NF2mt | NF2mt: NF2wt | p-value |
| --- | --- | --- | --- | --- | --- | --- | --- |
| AcCa 10:0 | [M+H]+ | 316.2482 | 8.23 | 0.0031±0.0028 | 0.0050±0.0038 | 1.48 | 0.132 |
| AcCa 10:1 | [M+H]+ | 314.2326 | 8.30 | 9.0.10-4±7.9.10-4 | 8.0.10-4±6.3.10-4 | 0.88 | 0.478 |
| AcCa 10:3 | [M+H]+ | 310.2013 | 8.67 | 7.1.10-4±5.5.10-4 | 6..10-4±5.0.10-4 | 0.79 | 0.999 |
| AcCa 12:0 | [M+H]+ | 344.2795 | 7.99 | 0.0014±0.0014 | 0.0018±0.0012 | 1.30 | 0.093 |
| AcCa 12:1 | [M+H]+ | 342.2639 | 8.02 | 0.0010±0.0007 | 9.6.10-4±7.0.10-4 | 0.99 | 0.366 |
| AcCa 14:0 | [M+H]+ | 372.3108 | 7.80 | 9.9.10-4±6.8.10-4 | 0.0017±0.0009 | 1.58 | 0.018 |
| AcCa 14:1 | [M+H]+ | 370.2952 | 7.78 | 0.0016±0.0012 | 0.0022±0.0014 | 1.15 | 0.171 |
| AcCa 14:2 | [M+H]+ | 368.2795 | 7.89 | 7.0.10-4±5.4.10-4 | 0.8011±0.5092 | 0.98 | 0.448 |
| AcCa 16:0 | [M+H]+ | 400.3421 | 7.65 | 0.0027±0.0011 | 0.0033±0.0014 | 1.59 | 0.046 |
| AcCa 16:1 | [M+H]+ | 398.3265 | 7.66 | 0.0011±0.0007 | 0.0011±0.0007 | 1.40 | 0.097 |
| AcCa 18:1 | [M+H]+ | 426.3578 | 7.53 | 0.0023±0.0010 | 0.0035±0.0019 | 1.37 | 0.156 |
| AcCa 18:2 | [M+H]+ | 424.3421 | 7.59 | 0.0012±0.0008 | 0.0012±0.0007 | 1.14 | 0.472 |
| AcCa 8:0 | [M+H]+ | 288.2169 | 8.59 | 0.0066±0.0058 | 0.0105±0.0085 | 1.54 | 0.077 |
| Cer 42:2;O2 | [M+H]+ | 648.6289 | 1.60 | 4.6.10-4±0.7.10-4 | 3.5.10-4±1.0.10-4 | 0.98 | 0.002 |
| HexCer 36:1;O2 | [M+H]+ | 728.6035 | 3.62 | 5.7.10-6±4.7.10-6 | 6.0.10-6±5.2.10-6 | 0.87 | 0.662 |
| HexCer 36:1;O3 | [M+H]+ | 744.5984 | 5.59 | 6.4.10-6±5.7.10-6 | 2.0.10-5±1.8.10-5 | 2.79 | 0.021 |
| HexCer 40:1;O3 | [M+H]+ | 800.6610 | 5.39 | 2.2.10-6±1.1.10-6 | 1.6.10-6±0.9.10-6 | 1.27 | 0.168 |
| HexCer 41:1;O3 | [M+H]+ | 814.6767 | 5.34 | 2.4.10-5±2.0.10-5 | 1.1.10-5±1.0.10-5 | 1.09 | 0.244 |
| HexCer 42:1;O3 | [M+H]+ | 828.6923 | 5.29 | 4.1.10-5±3.8.10-5 | 3.1.10-5±3.0.10-5 | 0.95 | 0.712 |
| HexCer 42:2;O2 | [M+H]+ | 810.6817 | 3.33 | 1.6.10-4±1.3.10-4 | 2.6.10-4±2.2.10-4 | 1.29 | 0.741 |
| HexCer 42:2;O3 | [M+H]+ | 826.6767 | 5.35 | 2.0.10-5±1.5.10-5 | 1.1.10-5±0.7.10-5 | 1.09 | 0.030 |
| HexCer 43:1;O3 | [M+H]+ | 842.7080 | 5.25 | 5.9.10-7±3.8.10-7 | 3.1.10-7±1.8.10-7 | 0.88 | 0.044 |
| HexCer 43:2;O2 | [M+H]+ | 824.6974 | 3.28 | 1.0.10-6±0.7.10-6 | 1.0.10-6±0.7.10-6 | 1.32 | 0.431 |
| HexCer 44:2:O2 | [M+H]+ | 838.7130 | 3.23 | 3.7.10-6±3.2.10-6 | 2.0.10-6±1.6.10-6 | 0.90 | 0.298 |
| HexCer 44:4;O2 | [M+H]+ | 834.6817 | 3.23 | 9.2.10-6±8.7.10-6 | 1.2.10-4±1.2.10-4 | 1.75 | 0.065 |
| HexCer 44:5;O2 | [M+H]+ | 832.6661 | 2.84 | 8.4.10-7±4.7.10-7 | 3.0.10-6±2.6.10-6 | 0.90 | 0.052 |
| LPC 16:0 | [M+Na]+ | 518.3217 | 8.63 | 3.7.10-4±1.4.10-4 | 2.5.10-4±1.0.10-4 | 0.77 | 0.027 |
| LPC 16:0 | [M+H]+ | 496.3398 | 8.93 | 0.0046±0.0017 | 0.0028±0.0013 | 0.72 | 0.002 |
| LPC 18:0 | [M+H]+ | 524.3711 | 8.77 | 0.0020±0.0007 | 0.0012±0.0005 | 0.81 | 0.004 |
| LPC 18:0 | [M+Na]+ | 546.3530 | 8.77 | 0.0013±0.0004 | 8.2.10-4±3.3.10-4 | 0.68 | 0.001 |
| LPC 18:1 | [M+H]+ | 522.3554 | 8.51 | 7.1.10-4±1.2.10-4 | 6.4.10-4±2.2.10-4 | 1.25 | 0.490 |
| LPC 18:1 | [M+H]+ | 522.3554 | 8.81 | 0.0013±0.0004 | 0.0010±0.0004 | 0.85 | 0.022 |
| LPC 18:3 | [M+H]+ | 518.3241 | 8.61 | 4.1.10-4±1.7.10-4 | 2.7.10-4±1.1.10-4 | 0.70 | 0.009 |
| LPC 18:3 | [M+H]+ | 518.3241 | 8.94 | 0.0032±0.0014 | 0.0016±0.0007 | 0.58 | 0.002 |
| LPC 20:3 | [M+H]+ | 546.3554 | 8.78 | 0.0014±0.0005 | 8.5.10-4±3.3.10-4 | 0.68 | <0.001 |
| LPC 20:4 | [M+H]+ | 544.3398 | 8.46 | 0.0011±0.0002 | 9.1.10-4±2.4.10-4 | 0.98 | 0.056 |
| LPC 20:4 | [M+H]+ | 544.3398 | 8.81 | 0.0012±0.0004 | 7.5.10-4±2.7.10-4 | 0.71 | 0.009 |
| LPC 34:1 | [M+Na]+ | 768.5878 | 6.49 | 0.0035±0.0007 | 0.0044±0.0004 | 1.27 | <0.001 |
| LPE 18:1 | [M+H]+ | 480.3085 | 9.99 | 3.7.10-4±2.0.10-4 | 4.2.10-4±1.9.10-4 | 1.30 | 0.431 |
| LPE P–18:1 | [M+Na]+ | 486.2955 | 9.89 | 5.9.10-5±3.1.10-5 | 1.0.10-5±0.8.10-5 | 0.35 | <0.001 |
| PC 30:0 | [M+Na]+ | 728.5201 | 6.76 | 0.0020±0.0005 | 0.0019±0.0003 | 1.05 | 0.734 |
| PC 31:1 | [M+H]+ | 718.5381 | 7.60 | 0.0041±0.0012 | 0.0047±0.0009 | 1.08 | 0.268 |
| PC 31:2 | [M+H]+ | 716.5225 | 7.65 | 7.0.10-4±1.2.10-4 | 6.9.10-4±1.8.10-4 | 0.91 | 0.228 |
| PC 32:0 | [M+Na]+ | 756.5514 | 6.73 | 0.0119±0.0025 | 0.0102±0.0015 | 0.87 | 0.089 |
| PC P–32:1 | [M+H]+ | 716.5589 | 7.42 | 4.1.10-4±1.2.10-4 | 5.4.10-4±1.4.10-4 | 1.31 | 0.005 |
| PC 32:3 | [M+H]+ | 728.5225 | 6.77 | 0.0019±0.0005 | 0.0019±0.0004 | 1.03 | 0.503 |
| PC 33:0 | [M+Na]+ | 770.5670 | 6.73 | 4.8.10-4±1.8.10-4 | 4.2.10-4±1.6.10-4 | 0.82 | 0.123 |
| PC 33:1 | [M+Na]+ | 768.5514 | 6.62 | 7.0.10-4±2.3.10-4 | 6.6.10-4±1.6.10-4 | 0.97 | 0.648 |
| PC 33:1 | [M+H]+ | 746.5694 | 7.52 | 0.0045±0.0011 | 0.0047±0.0008 | 0.96 | 0.420 |
| PC 33:1 | [M+Na]+ | 768.5514 | 7.52 | 0.0099±0.0035 | 0.0095±0.0040 | 0.96 | 0.756 |
| PC 33:2 | [M+H]+ | 744.5538 | 7.54 | 0.0025±0.0006 | 0.0020±0.0003 | 0.83 | 0.037 |
| PC 34:0 | [M+Na]+ | 784.5827 | 6.53 | 0.0149±0.0024 | 0.0145±0.0030 | 0.99 | 0.560 |
| PC 34:1 | [M+Na]+ | 782.5670 | 6.54 | 0.0610±0.0061 | 0.0612±0.0067 | 1.01 | 0.741 |
| PC 34:1 | [M+H]+ | 760.5851 | 6.54 | 0.0887±0.0183 | 0.0949±0.0111 | 1.12 | 0.064 |
| PC P–34:1 | [M+H]+ | 744.5902 | 7.39 | 1.4.10-5±1.0.10-5 | 2.7.10-5±1.6.10-5 | 2.95 | 0.016 |
| PC 34:2 | [M+Na]+ | 780.5514 | 6.56 | 0.0119±0.0032 | 0.0079±0.0017 | 0.68 | <0.001 |
| PC 34:2 | [M+H]+ | 758.5694 | 6.56 | 0.0265±0.0074 | 0.0190±0.0050 | 0.74 | 0.001 |
| PC P–34:2 | [M+H]+ | 742.5745 | 7.36 | 8.0.10-5±4.9.10-5 | 1.0.10-5±0.6.10-5 | 0.96 | 0.669 |
| PC 35:1 | [M+Na]+ | 796.5827 | 6.52 | 0.0015±0.0003 | 0.0014±0.0002 | 0.95 | 0.317 |
| PC 35:2 | [M+H]+ | 772.5851 | 7.49 | 3.6.10-4±1.0.10-4 | 2.5.10-4±0.6.10-4 | 0.74 | 0.002 |
| PC 35:4 | [M+H]+ | 768.5538 | 7.38 | 0.0111±0.0025 | 0.0115±0.0020 | 1.02 | 0.778 |
| PC 35:6 | [M+H]+ | 764.5225 | 7.42 | 0.0013±0.0002 | 0.0012±0.0003 | 0.96 | 0.553 |
| PC 36:1 | [M+H]+ | 788.6164 | 6.45 | 0.0168±0.0029 | 0.0192±0.0046 | 1.13 | 0.115 |
| PC 36:1 | [M+Na]+ | 810.5983 | 6.45 | 0.0233±0.0035 | 0.0243±0.0034 | 1.02 | 0.786 |
| PC 36:2 | [M+Na]+ | 808.5827 | 6.47 | 0.0154±0.0030 | 0.0136±0.0031 | 0.85 | 0.010 |
| PC 36:2 | [M+H]+ | 786.6007 | 6.47 | 0.0195±0.0037 | 0.0160±0.0035 | 0.87 | 0.012 |
| PC 36:3 | [M+Na]+ | 806.5670 | 6.46 | 0.0075±0.0011 | 0.0068±0.0017 | 0.90 | 0.183 |
| PC P–36:3 | [M+H]+ | 768.5902 | 6.49 | 0.0034±0.0006 | 0.0044±0.0004 | 1.25 | <0.001 |
| PC P–36:3 | [M+H]+ | 768.5902 | 7.27 | 2.2.10-5±1.0.10-5 | 3.8.10-5±1.7.10-5 | 1.80 | 0.001 |
| PC 36:4 | [M+Na]+ | 804.5514 | 6.46 | 0.0089±0.0035 | 0.0088±0.0028 | 0.89 | 0366 |
| PC 36:4 | [M+H]+ | 782.5694 | 6.46 | 0.0544±0.0060 | 0.0560±0.0061 | 1.01 | 0.573 |
| PC P–36:4 | [M+H]+ | 766.5745 | 7.27 | 1.6.10-4±0.4.10-4 | 1.5.10-4±0.5.10-4 | 0.92 | 0.553 |
| PC 36:5 | [M+Na]+ | 802.5357 | 6.55 | 4.2.10-4±1.5.10-4 | 2.9.10-4±1.3.10-4 | 0.72 | 0.025 |
| PC 36:5 | [M+H]+ | 780.5538 | 6.55 | 0.0119±0.0039 | 0.0079±0.0019 | 0.70 | 0.001 |
| PC 37:4 | [M+H]+ | 796.5851 | 7.41 | 5.0.10-4±1.0.10-4 | 5.7.10-4±1.3.10-4 | 0.83 | 0.771 |
| PC 37:6 | [M+H]+ | 792.5538 | 7.35 | 0.0015±0.0004 | 0.0018±0.0003 | 0.98 | 0.150 |
| PC 38:4 | [M+Na]+ | 832.5827 | 6.40 | 0.0085±0.0021 | 0.0084±0.0021 | 0.85 | 0.214 |
| PC 38:4 | [M+H]+ | 810.6007 | 6.40 | 0.0244±0.0029 | 0.0246±0.0036 | 1.01 | 0.786 |
| PC 38:5 | [M+Na]+ | 830.5670 | 6.41 | 0.0026±0.0010 | 0.0025±0.0009 | 0.90 | 0.478 |
| PC 38:5 | [M+H]+ | 808.5851 | 6.41 | 0.0150±0.0021 | 0.0126±0.0027 | 0.87 | 0.025 |
| PC 38:6 | [M+Na]+ | 828.5514 | 6.42 | 0.0010±0.0004 | 9.6.10-4±3.4.10-4 | 0.99 | 0.892 |
| PC 38:6 | [M+H]+ | 806.5694 | 6.42 | 0.0073±0.0011 | 0.0068±0.0018 | 0.91 | 0.268 |
| PC P–38:7 | [M+H]+ | 788.5589 | 7.26 | 6.7.10-5±2.2.10-5 | 7.6.10-5±2.9.10-5 | 1.27 | 0.669 |
| PC P–39:1 | [M+H]+ | 814.6684 | 4.78 | 4.4.10-7±1.8.10-7 | 4.9.10-7±1.9.10-7 | 0.99 | 0.946 |
| PC 40:8 | [M+H]+ | 830.5694 | 6.38 | 0.0027±0.0011 | 0.0025±0.0007 | 0.89 | 0.277 |
| PC 40:9 | [M+H]+ | 828.5538 | 6.39 | 9.9.10-4±3.6.10-4 | 9.4.10-4±3.1.10-4 | 0.98 | 0.823 |
| PE 34:0 | [M+Na]+ | 742.5357 | 7.55 | 8.8.10-4±1.6.10-4 | 8.1.10-4±1.6.10-4 | 0.90 | 0.130 |
| PE 34:1 | [M+H]+ | 718.5381 | 7.60 | 0.0041±0.0009 | 0.0045±0.0007 | 1.09 | 0193 |
| PE 34:1 | [M+Na]+ | 740.5201 | 7.60 | 0.0040±0.0007 | 0.0040±0.0008 | 0.98 | 0.999 |
| PE O–34:1 | [M+Na]+ | 726.5408 | 7.38 | 0.0019±0.0003 | 0.0019±0.0003 | 0.98 | 0.786 |
| PE P–34:1 | [M+H]+ | 702.5432 | 7.45 | 0.0090±0.0035 | 0.0132±0.0025 | 1.42 | <0.001 |
| PE P–34:1 | [M+Na]+ | 724.5252 | 7.45 | 0.0094±0.0037 | 0.0114±0.0034 | 1.20 | 0.062 |
| PE 34:2 | [M+Na]+ | 738.5044 | 7.60 | 7.7.10-4±2.1.10-4 | 6.2.10-4±1.3.10-4 | 0.83 | 0.019 |
| PE 36:1 | [M+Na]+ | 768.5514 | 7.43 | 0.0116±0.0028 | 0.0115±0.0027 | 0.97 | 0.831 |
| PE 36:1 | [M+H]+ | 746.5694 | 7.43 | 0.0047±0.0011 | 0.0047±0.0008 | 0.98 | 0.719 |
| PE 36:1 | [M+Na]+ | 768.5514 | 8.12 | 2.8.10-4±0.9.10-4 | 2.3.10-4±0.9.10-4 | 0.95 | 0.443 |
| PE P–36:1 | [M+H]+ | 730.5745 | 7.39 | 0.0035±0.0010 | 0.0032±0.0006 | 0.97 | 0.877 |
| PE 36:2 | [M+Na]+ | 766.5357 | 7.53 | 0.0035±0.0008 | 0.0030±0.0005 | 0.83 | 0.030 |
| PE 36:2 | [M+H]+ | 744.5538 | 7.53 | 0.0025±0.0005 | 0.0020±0.0003 | 0.83 | 0.032 |
| PE P–36:2 | [M+H]+ | 728.5589 | 7.40 | 0.0020±0.0005 | 0.0020±0.0003 | 0.90 | 0.600 |
| PE P–36:2 | [M+Na]+ | 750.5408 | 7.40 | 0.0059±0.0014 | 0.0060±0.0010 | 0.88 | 0.299 |
| PE 36:3 | [M+Na]+ | 764.5201 | 7.45 | 0.0013±0.0002 | 0.0012±0.0002 | 0.92 | 0.308 |
| PE 36:3 | [M+H]+ | 742.5381 | 7.45 | 8.6.10-4±1.9.10-4 | 7.5.10-4±1.7.10-4 | 0.87 | 0.057 |
| PE P–36:3 | [M+H]+ | 726.5432 | 7.39 | 0.0015±0.0002 | 0.0015±0.0003 | 0.97 | 0.969 |
| PE P–36:4 | [M+H]+ | 724.5276 | 7.36 | 0.0108±0.0036 | 0.0138±0.0043 | 1.20 | 0.042 |
| PE P–36:4 | [M+Na]+ | 746.5095 | 7.36 | 0.0074±0.0023 | 0.0063±0.0020 | 0.81 | 0.054 |
| PE O–37:1 | [M+Na]+ | 768.5878 | 7.26 | 2.4.10-5±0.9.10-5 | 3.8.10-5±1.7.10-5 | 1.71 | 0.003 |
| PE P–37:1 | [M+H]+ | 744.5902 | 6.68 | 0.0022±0.0008 | 0.0043±0.0009 | 1.84 | <0.001 |
| PE P–37:1 | [M+Na]+ | 766.5721 | 6.68 | 0.0025±0.0007 | 0.0022±0.0005 | 0.82 | 0.403 |
| PE P–37:2 | [M+H]+ | 742.5745 | 7.38 | 8.0.10-6±4.9.10-6 | 9.2.10-6±6.1.10-6 | 0.78 | 0.977 |
| PE 38:1 | [M+Na]+ | 796.5827 | 7.37 | 5.0.10-4±1.0.10-4 | 5.7.10-4±1.3.10-4 | 0.85 | 0.771 |
| PE 38:2 | [M+Na]+ | 794.5670 | 7.36 | 7.0.10-4±1.7.10-4 | 7.9.10-4±2.0.10-4 | 1.02 | 0.303 |
| PE 38:2 | [M+H]+ | 772.5851 | 7.36 | 3.6.10-4±1.0.10-4 | 2.5.10-4±0.6.10-4 | 0.74 | 0.003 |
| PE O–38:2 | [M+Na]+ | 780.5878 | 7.25 | 0.0011±0.0002 | 0.0012±0.0004 | 0.98 | 0.478 |
| PE P–38:2 | [M+H]+ | 756.5902 | 7.29 | 1.6.10-4±0.5.10-4 | 1.3.10-4±0.2.10-4 | 0.90 | 0.057 |
| PE P–38:2 | [M+Na]+ | 778.5721 | 7.29 | 0.0011±0.0002 | 0.0014±0.0004 | 1.17 | 0.032 |
| PE 38:3 | [M+Na]+ | 792.5514 | 7.34 | 0.0017±0.0003 | 0.0018±0.0004 | 1.01 | 0.168 |
| PE P–38:3 | [M+H]+ | 754.5745 | 7.28 | 0.0016±0.0003 | 0.0013±0.0003 | 0.86 | 0.009 |
| PE 38:4 | [M+Na]+ | 790.5357 | 7.39 | 0.0067±0.0013 | 0.0071±0.0014 | 1.00 | 0.884 |
| PE 38:4 | [M+H]+ | 768.5538 | 7.39 | 0.0105±0.0028 | 0.0113±0.0028 | 0.99 | 0.892 |
| PE P–38:4 | [M+H]+ | 752.5589 | 7.27 | 0.0147±0.0034 | 0.0124±0.0020 | 0.77 | 0.002 |
| PE P–38:4 | [M+Na]+ | 774.5408 | 7.27 | 0.0096±0.0029 | 0.0077±0.0016 | 0.75 | 0.004 |
| PE 38:5 | [M+Na]+ | 788.5201 | 7.43 | 0.0015±0.0003 | 0.0013±0.0004 | 0.84 | 0.051 |
| PE 38:5 | [M+H]+ | 766.5381 | 7.43 | 0.0035±0.0009 | 0.0030±0.0005 | 0.84 | 0.054 |
| PE P–38:5 | [M+H]+ | 750.5432 | 7.32 | 0.0067±0.0016 | 0.0062±0.0015 | 0.84 | 0.089 |
| PE 38:6 | [M+Na]+ | 786.5044 | 7.44 | 6.1.10-4±1.2.10-4 | 6.0.10-4±1.6.10-4 | 1.00 | 0.831 |
| PE 38:6 | [M+H]+ | 764.5225 | 7.44 | 0.0013±0.0003 | 0.0012±0.0003 | 0.96 | 0.398 |
| PE P–38:6 | [M+H]+ | 748.5276 | 7.29 | 0.0017±0.0004 | 0.0032±0.0009 | 1.65 | <0.001 |
| PE P–38:6 | [M+Na]+ | 770.5095 | 7.29 | 9.9.10-4±3.4.10-4 | 0.0017±0.0005 | 1.81 | <0.001 |
| PE 38:7 | [M+H]+ | 762.5068 | 7.43 | 0.0020±0.0008 | 0.0018±0.0006 | 0.98 | 0.786 |
| PE O–40:2 | [M+Na]+ | 808.6191 | 7.21 | 6.1.10-4±3.1.10-4 | 6.6.10-4±3.1.10-4 | 0.91 | 0.690 |
| PE P–40:2 | [M+Na]+ | 806.6034 | 7.20 | 1.1.10-4±0.7.10-4 | 1.1.10-4±0.5.10-4 | 0.90 | 0.627 |
| PE 40:4 | [M+Na]+ | 818.5670 | 7.38 | 3.3.10-4±1.0.10-4 | 3.5.10-4±1.0.10-4 | 0.87 | 0.641 |
| PE 40:4 | [M+H]+ | 796.5851 | 7.38 | 5.0.10-4±1.0.10-4 | 5.7.10-4±1.3.10-4 | 0.83 | 0.771 |
| PE O–40:4 | [M+Na]+ | 804.5878 | 7.20 | 1.9.10-4±6.8.10-4 | 2.3.10-4±7.8.10-4 | 1.13 | 0.120 |
| PE P–40:4 | [M+H]+ | 780.5902 | 7.23 | 0.0011±0.0002 | 0.0012±0.0003 | 0.97 | 0.503 |
| PE P–40:4 | [M+Na]+ | 802.5721 | 7.23 | 7.7.10-4±1.8.10-4 | 8.2.10-4±2.8.10-4 | 0.99 | 0.823 |
| PE 40:5 | [M+Na]+ | 816.5514 | 7.35 | 3.9.10-4±0.9.10-4 | 4.5.10-4±1.8.10-4 | 1.11 | 0.148 |
| PE 40:5p | [M+H]+ | 778.5745 | 7.25 | 0.0011±0.0002 | 0.0014±0.0004 | 1.18 | 0.040 |
| PE 40:6 | [M+Na]+ | 814.5357 | 7.36 | 5.6.10-4±1.5.10-4 | 7.1.10-4±1.9.10-4 | 1.05 | 0.048 |
| PE 40:6 | [M+H]+ | 792.5538 | 7.36 | 0.0015±0.0004 | 0.0018±0.0003 | 1.01 | 0.148 |
| PE P–40:6 | [M+Na]+ | 798.5408 | 7.21 | 9.8.10-4±2.8.10-4 | 0.0014±0.0004 | 1.28 | 0.002 |
| PE 40:6p | [M+H]+ | 776.5589 | 7.21 | 0.0019±0.0004 | 0.0027±0.0008 | 1.18 | 0.005 |
| PE 40:7 | [M+Na]+ | 812.5201 | 7.38 | 0.0011±0.0003 | 0.0011±0.0003 | 0.99 | 0.992 |
| PE 40:7 | [M+H]+ | 790.5381 | 7.38 | 0.0062±0.0008 | 0.0061±0.0009 | 0.98 | 0.763 |
| PE P–40:7 | [M+H]+ | 774.5432 | 7.28 | 0.0079±0.0028 | 0.0070±0.0018 | 0.75 | 0.014 |
| PE P–40:7 | [M+Na]+ | 796.5252 | 7.28 | 0.0020±0.0006 | 0.0016±0.0004 | 0.78 | 0.033 |
| PE P–42:4 | [M+H]+ | 808.6215 | 7.19 | 7.9.10-5±3.5.10-5 | 7.1.10-5±3.2.10-5 | 0.95 | 0.734 |
| PE P–42:5 | [M+H]+ | 806.6058 | 7.22 | 9.2.10-5±8.0.10-5 | 1.2.10-4±0.5.10-4 | 1.00 | 0.861 |
| PE 42:9 | [M+H]+ | 814.5381 | 7.35 | 5.4.10-4±1.9.10-4 | 7.0.10-4±1.9.10-4 | 1.07 | 0.044 |
| PS 36:1 | [M+H]+ | 790.5593 | 8.73 | 0.0056±0.0006 | 0.0057±0.0016 | 1.05 | 0.778 |
| PS 36:1 | [M+Na]+ | 812.5412 | 8.73 | 0.0077±0.0010 | 0.0075±0.0020 | 0.92 | 0.443 |
| PS 36:2 | [M+H]+ | 788.5436 | 8.67 | 5.1.10-4±2.7.10-4 | 2.6.10-4±1.7.10-4 | 0.66 | 0.030 |
| PS 38:3 | [M+Na]+ | 836.5412 | 9.28 | 3.7.10-4±2.8.10-4 | 6.1.10-4±2.5.10-4 | 1.28 | 0.017 |
| PS 38:4 | [M+Na]+ | 834.5256 | 8.67 | 0.0025±0.0012 | 0.0031±0.0012 | 1.06 | 0.613 |
| PS 38:4 | [M+H]+ | 812.5436 | 8.67 | 0.0077±0.0006 | 0.0076±0.0020 | 0.91 | 0.627 |
| PS 40:7 | [M+Na]+ | 856.5099 | 8.58 | 4.6.10-4±1.2.10-4 | 5.8.10-4±1.9.10-4 | 1.04 | 0.371 |
| SM 34:1;O2 | [M+H]+ | 703.5749 | 8.09 | 0.0258±0.0057 | 0.0272±0.0053 | 1.09 | 0.135 |
| SM 36:1;O2 | [M+H]+ | 731.6062 | 7.97 | 0.0130±0.0047 | 0.0149±0.0051 | 0.94 | 0.719 |
| SM 36:2;O2 | [M+H]+ | 729.5905 | 8.07 | 9.7.10-4±2.7.10-4 | 9.8.10-4±3.3.10-4 | 0.86 | 0.484 |
| SM 36:3;O2 | [M+H]+ | 727.5749 | 7.82 | 0.0018±0.0003 | 0.0014±0.0005 | 0.82 | 0.034 |
| SM 36:4;O2 | [M+H]+ | 725.5592 | 8.09 | 0.0167±0.0032 | 0.0185±0.0032 | 1.05 | 0.290 |
| SM 36:5;O2 | [M+H]+ | 723.5436 | 8.10 | 5.9.10-4±1.4.10-4 | 5.1.10-4±1.4.10-4 | 0.92 | 0.177 |
| SM 37:1;O2 | [M+H]+ | 745.6218 | 8.01 | 6.3.10-4±3.0.10-4 | 5.4.10-4±1.6.10-4 | 0.76 | 0.084 |
| SM 38:4;O2 | [M+H]+ | 753.5905 | 8.01 | 0.0069±0.0033 | 0.0072±0.0026 | 0.89 | 0.892 |
| SM 38:5;O2 | [M+H]+ | 751.5749 | 8.01 | 6.1.10-4±1.9.10-4 | 5.7.10-4±1.7.10-4 | 0.82 | 0.125 |
| SM 39:4;O2 | [M+H]+ | 767.6062 | 7.96 | 5.0.10-4±1.8.10-4 | 3.8.10-4±1.2.10-4 | 0.75 | 0.017 |
| SM 40:1;O2 | [M+H]+ | 787.6688 | 7.80 | 0.0092±0.0022 | 0.0120±0.0037 | 1.32 | 0.006 |
| SM 40:2;O2 | [M+H]+ | 785.6531 | 7.83 | 0.0021±0.0006 | 0.0023±0.0004 | 1.05 | 0.240 |
| SM 40:4;O2 | [M+H]+ | 781.6218 | 7.91 | 0.0024±0.0005 | 0.0022±0.0006 | 0.93 | 0.281 |
| SM 41:4;O2 | [M+H]+ | 795.6375 | 7.88 | 4.0.10-4±1.2.10-4 | 5.1.10-4±1.5.10-4 | 1.22 | 0.035 |
| SM 42:1;O2 | [M+H]+ | 815.7001 | 7.76 | 0.0151±0.0030 | 0.0172±0.0054 | 1.11 | 0.186 |
| SM 42:2;O2 | [M+H]+ | 813.6844 | 7.81 | 0.0274±0.0063 | 0.0251±0.0059 | 0.97 | 0.793 |
| SM 42:4;O2 | [M+H]+ | 809.6531 | 7.85 | 0.0056±0.0010 | 0.0065±0.0018 | 1.20 | 0.095 |
| SM 43:2;O2 | [M+H]+ | 827.7001 | 7.77 | 8.7.10-4±3.7.10-4 | 5.8.10-4±1.5.10-4 | 0.70 | 0.010 |
| SM 44:4;O2 | [M+H]+ | 837.6844 | 7.79 | 0.0070±0.0021 | 0.0076±0.0023 | 1.10 | 0.317 |
| SM 44:5;O2 | [M+H]+ | 835.6688 | 7.81 | 0.0155±0.0031 | 0.0151±0.0038 | 0.94 | 0.336 |
| SM 44:6;O2 | [M+H]+ | 833.6531 | 7.83 | 0.0022±0.0004 | 0.0020±0.0004 | 0.92 | 0.232 |
| SM 45:5;O2 | [M+H]+ | 849.6844 | 7.78 | 4.2.10-4±1.4.10-4 | 2.7.10-4±0.8.10-4 | 0.66 | <0.001 |
| SHexCer 35:1;O3 | [M+H]+ | 810.5396 | 1.67 | 6.1.10-8±2.5.10-8 | 5.9.10-8±3.1.10-8 | 0.43 | 0.861 |
| SPB 14:0;O2 | [M+H]+ | 246.2428 | 11.57 | 1.4.10-4±0.9.10-4 | 1.3.10-4±0.7.10-4 | 0.73 | 0.999 |
| SPB 14:0;O2 | [M+H]+ | 246.2428 | 11.87 | 5.5.10-5±3.6.10-5 | 8.2.10-5±5.2.10-5 | 1.03 | 0.553 |
| SPB 14:0;O3 | [M+H]+ | 262.2377 | 3.70 | 0.0042±0.0023 | 0.0034±0.0025 | 0.93 | 0.923 |
| SPB 18:0;O3 | [M+H]+ | 318.3003 | 5.08 | 0.0024±0.0017 | 0.0022±0.0014 | 0.59 | 0.690 |
| SPB 22:1;O3 | [M+H]+ | 372.3472 | 4.98 | 0.0098±0.0071 | 0.0100±0.0052 | 1.01 | 0.712 |
| TG 48:4 | [M+NH4]+ | 816.7076 | 7.57 | 0.0056±0.0016 | 0.0065±0.0019 | 1.19 | 0.105 |

Table S3 The list of lipid species detected using Hn

| Analyte | Adduct | m/z | RT | NF2wt | NF2mt | NF2mt: NF2wt | p-value |
| --- | --- | --- | --- | --- | --- | --- | --- |
| PE 34:1 | [M-H]– | 716.5236 | 7.58 | 0.0376±0.0099 | 0.0423±0.0084 | 1.07 | 0.156 |
| PE P–34:1 | [M-H]– | 700.5287 | 7.44 | 0.0789±0.0344 | 0.1238±0.0261 | 1.44 | <0.001 |
| PE 34:2 | [M-H]– | 714.5079 | 7.59 | 0.0064±0.0014 | 0.0060±0.0021 | 0.92 | 0.312 |
| PE P–35:1 | [M-H]– | 714.5443 | 7.39 | 0.0036±0.0014 | 0.0049±0.0015 | 1.35 | 0.005 |
| PE 36:1 | [M-H]– | 744.5549 | 7.51 | 0.0439±0.0084 | 0.0425±0.0079 | 0.92 | 0.472 |
| PE P–36:1 | [M-H]– | 728.5600 | 7.36 | 0.0320±0.0090 | 0.0302±0.0069 | 0.96 | 0.648 |
| PE 36:2 | [M-H]– | 742.5392 | 7.51 | 0.0200±0.0062 | 0.0178±0.0033 | 0.82 | 0.021 |
| PE P–36:2 | [M-H]– | 726.5443 | 7.37 | 0.0173±0.0052 | 0.0164±0.0016 | 0.87 | 0.366 |
| PE 36:3 | [M-H]– | 740.5236 | 7.50 | 0.0056±0.0012 | 0.0045±0.0015 | 0.82 | 0.027 |
| PE O–36:4 | [M-H]– | 724.5287 | 7.31 | 0.0101±0.0021 | 0.0089±0.0020 | 0.87 | 0.122 |
| PE P–36:4 | [M-H]– | 722.5130 | 7.30 | 0.0915±0.0199 | 0.0807±0.0177 | 0.90 | 0.193 |
| PE 38:1 | [M-H]– | 772.5862 | 7.45 | 4.8.10-5±3.2.10-5 | 1.5.10-4±1.4.10-4 | 0.52 | 0.002 |
| PE 38:4 | [M-H]– | 766.5392 | 7.37 | 0.0817±0.0161 | 0.0822±0.0126 | 1.06 | 0.240 |
| PE P–38:4 | [M-H]– | 750.5443 | 7.24 | 0.1035±0.0298 | 0.0812±0.0160 | 0.72 | <0.001 |
| PE 38:5 | [M-H]– | 764.5236 | 7.37 | 0.0130±0.0035 | 0.0124±0.0037 | 0.90 | 0.264 |
| PE P–38:5 | [M-H]– | 748.5287 | 7.24 | 0.0409±0.0104 | 0.0384±0.0100 | 0.86 | 0.341 |
| PE 38:6 | [M-H]– | 762.5079 | 7.42 | 0.0040±0.0019 | 0.0062±0.0019 | 1.20 | 0.037 |
| PE P–38:6 | [M-H]– | 746.5130 | 7.27 | 0.0101±0.0032 | 0.0235±0.0068 | 2.16 | <0.001 |
| PE P–40:4 | [M-H]– | 778.5756 | 7.21 | 0.0069±0.0024 | 0.0079±0.0030 | 1.02 | 0.567 |
| PE 40:6 | [M-H]– | 790.5392 | 7.33 | 0.0036±0.0017 | 0.0067±0.0017 | 1.12 | <0.001 |
| PE O–40:6 | [M-H]– | 776.5600 | 7.22 | 0.0050±0.0026 | 0.0094±0.0027 | 1.52 | <0.001 |
| PE P–40:6 | [M-H]– | 774.5443 | 7.19 | 0.0075±0.0030 | 0.0147±0.0041 | 1.45 | <0.001 |
| PI 38:4 | [M-H]– | 885.5499 | 7.31 | 0.1906±0.0210 | 0.1880±0.0248 | 1.01 | 0.634 |
| PS 36:1 | [M-H]– | 788.5447 | 8.61 | 0.1361±0.0316 | 0.1218±0.0278 | 0.93 | 0.351 |
| SM 34:1;O2 | [M+CH3COO]– | 761.5814 | 8.07 | 0.0089±0.0018 | 0.0093±0.0018 | 1.12 | 0.200 |
| SM 36:1;O2 | [M+CH3COO]– | 789.6127 | 7.98 | 0.0032±0.0019 | 0.0033±0.0016 | 1.00 | 0.573 |

Table S4 The list of lipid species detected using Rp

| Analyte | Adduct | m/z | RT | NF2wt | NF2mt | NF2mt: NF2wt | p-value |
| --- | --- | --- | --- | --- | --- | --- | --- |
| Cer 42:2;O2 | [M+H]+ | 648.6289 | 11.36 | 0.0030±0.0005 | 0.0026±0.0012 | 1.44 | 0.281 |
| HexCer 36:1;O2 | [M+H]+ | 728.6035 | 9.25 | 1.1.10-4±0.9.10-4 | 8.7.10-5±7.5.10-5 | 0.62 | 0.346 |
| HexCer 36:1;O3 | [M+H]+ | 744.5984 | 9.02 | 1.7.10-4±1.4.10-4 | 1.8.10-4±1.2.10-4 | 1.40 | 0.923 |
| HexCer 42:1;O2 | [M+H]+ | 812.6974 | 11.26 | 5.8.10-4±3.2.10-4 | 9.2.10-4±4.3.10-4 | 1.30 | 0.072 |
| HexCer 42:1;O3 | [M+H]+ | 828.6923 | 11.10 | 1.2.10-4±1.0.10-4 | 1.0.10-4±1.0.10-4 | 0.98 | 0.490 |
| HexCer 42:2;O2 | [M+H]+ | 810.6817 | 10.76 | 4.5.10-4±2.6.10-4 | 6.9.10-4±3.6.10-4 | 1.39 | 0.171 |
| HexCer 42:2;O3 | [M+H]+ | 826.6767 | 10.58 | 3.1.10-5±2.3.10-5 | 1.9.10-5±1.2.10-5 | 1.46 | 0.294 |
| HexCer 43:1;O3 | [M+H]+ | 842.7080 | 11.36 | 2.0.10-4±1.7.10-4 | 2.2.10-4±1.7.10-4 | 0.93 | 0.969 |
| HexCer 43:2;O2 | [M+H]+ | 824.6974 | 11.04 | 1.5.10-5±0.8.10-5 | 1.1.10-5±0.5.10-5 | 0.49 | 0.210 |
| HexCer 43:2;O3 | [M+H]+ | 840.6923 | 10.87 | 5.7.10-5±3.8.10-5 | 3.4.10-5±2.2.10-5 | 0.88 | 0.033 |
| HexCer 44:2;O2 | [M+H]+ | 838.7130 | 11.29 | 6.8.10-5±5.9.10-5 | 4.5.10-5±3.5.10-5 | 0.48 | 0.064 |
| HexCer 44:2;O3 | [M+H]+ | 854.7080 | 11.14 | 1.1.10-5±0.5.10-5 | 1.0.10-5±0.6.10-5 | 1.96 | 0.698 |
| ChE 18:2 | [M+NH4]+ | 666.6184 | 13.87 | 0.0268±0.0174 | 0.0170±0.0123 | 0.82 | 0.174 |
| ChE 20:4 | [M+NH4]+ | 690.6184 | 13.79 | 0.0069±0.0047 | 0.0035±0.0029 | 1.81 | 0.174 |
| ChE 20:5 | [M+NH4]+ | 688.6027 | 13.57 | 4.1.10-4±3.7.10-4 | 1.9.10-4±1.7.10-4 | 1.57 | 0.521 |
| PC 31:1 | [M+H]+ | 718.5381 | 9.45 | 0.0127±0.0036 | 0.0142±0.0032 | 1.01 | 0.690 |
| PC 32:0 | [M+Na]+ | 756.5514 | 9.10 | 0.0097±0.0020 | 0.0097±0.0014 | 0.86 | 0.641 |
| PC 32:1 | [M+Na]+ | 754.5357 | 8.50 | 0.0032±0.0008 | 0.0029±0.0007 | 1.04 | 0.876 |
| PC 33:1 | [M+H]+ | 746.5694 | 10.17 | 0.0200±0.0049 | 0.0170±0.0043 | 0.90 | 0.148 |
| PC 33:2 | [M+H]+ | 744.5538 | 9.62 | 0.0078±0.0028 | 0.0067±0.0020 | 0.82 | 0.080 |
| PC 34:0 | [M+Na]+ | 784.5827 | 9.88 | 0.0015±0.0004 | 0.0016±0.0004 | 1.02 | 0.371 |
| PC 34:1 | [M+Na]+ | 782.5670 | 9.31 | 0.0424±0.0053 | 0.0433±0.0058 | 1.08 | 0.236 |
| PC 34:1 | [M+H]+ | 760.5851 | 9.31 | 0.2495±0.0273 | 0.2549±0.0356 | 1.05 | 0.341 |
| PC 34:1 | [M+H]+ | 760.5851 | 9.96 | 0.0038±0.0009 | 0.0041±0.0009 | 1.00 | 0.741 |
| PC P–34:1 | [M+Na]+ | 766.5721 | 9.71 | 6.2.10-4±3.9.10-4 | 0.0015±0.0005 | 2.06 | <0.001 |
| PC P–34:1 | [M+H]+ | 744.5902 | 9.71 | 0.0039±0.0020 | 0.0087±0.0019 | 1.90 | <0.001 |
| PC 34:3 | [M+H]+ | 756.5538 | 9.10 | 0.0097±0.0020 | 0.0097±0.0014 | 0.86 | 0.676 |
| PC 34:4 | [M+H]+ | 754.5381 | 8.54 | 0.0032±0.0008 | 0.0029±0.0007 | 1.03 | 0.907 |
| PC 35:2 | [M+Na]+ | 794.5670 | 9.72 | 3.4.10-4±2.2.10-4 | 3.3.10-4±1.9.10-4 | 0.70 | 0.593 |
| PC 35:4 | [M+H]+ | 768.5538 | 9.57 | 0.0012±0.0005 | 7.9.10-4±4.4.10-4 | 4.39 | 0.260 |
| PC 36:2 | [M+Na]+ | 808.5827 | 9.52 | 0.0090±0.0020 | 0.0065±0.0021 | 0.80 | 0.010 |
| PC 36:2 | [M+H]+ | 786.6007 | 9.52 | 0.0556±0.0129 | 0.0390±0.0117 | 0.79 | 0.004 |
| PC 36:3 | [M+Na]+ | 806.5670 | 9.09 | 0.0031±0.0013 | 0.0027±0.0012 | 0.89 | 0.414 |
| PC 36:3 | [M+H]+ | 784.5851 | 9.89 | 0.0015±0.0004 | 0.0016±0.0004 | 1.02 | 0.371 |
| PC P–36:3 | [M+Na]+ | 790.5721 | 9.33 | 6.1.10-4±3.9.10-4 | 0.0011±0.0004 | 1.13 | 0.024 |
| PC P–36:3 | [M+H]+ | 768.5902 | 9.33 | 0.0024±0.0011 | 0.0043±0.0014 | 1.48 | <0.001 |
| PC P–36:4 | [M+H]+ | 766.5745 | 9.69 | 6.6.10-4±3.8.10-4 | 0.0015±0.0004 | 2.08 | <0.001 |
| PC 38:4 | [M+H]+ | 810.6007 | 10.08 | 0.0105±0.0018 | 0.0105±0.0018 | 1.05 | 0.586 |
| PC 38:5 | [M+H]+ | 808.5851 | 9.62 | 0.0091±0.0020 | 0.0068±0.0014 | 0.83 | 0.009 |
| PC 38:6 | [M+H]+ | 806.5694 | 9.25 | 0.0032±0.0012 | 0.0024±0.0012 | 0.81 | 0.142 |
| PE 34:1 | [M+H]+ | 718.5381 | 9.44 | 0.0125±0.0034 | 0.0132±0.0028 | 1.02 | 0.786 |
| PE O–34:1 | [M+Na]+ | 726.5408 | 9.86 | 4.2.10-4±2.4.10-4 | 6.3.10-4±1.9.10-4 | 0.90 | 0.553 |
| PE P–34:1 | [M+H]+ | 702.5432 | 9.86 | 0.0315±0.0102 | 0.0433±0.0137 | 1.35 | 0.003 |
| PE P–34:1 | [M+Na]+ | 724.5252 | 9.86 | 0.0058±0.0020 | 0.0082±0.0023 | 1.37 | 0.003 |
| PE 36:1 | [M+Na]+ | 768.5514 | 9.75 | 0.0281±0.0084 | 0.0264±0.0111 | 1.00 | 0.969 |
| PE 36:1 | [M+Na]+ | 768.5514 | 10.18 | 0.0039±0.0007 | 0.0037±0.0008 | 0.95 | 0.361 |
| PE 36:1 | [M+H]+ | 746.5694 | 10.18 | 0.0199±0.0047 | 0.0178±0.0033 | 0.93 | 0.210 |
| PE 36:2 | [M+Na]+ | 766.5357 | 9.14 | 0.0027±0.0016 | 0.0028±0.0011 | 0.88 | 0.431 |
| PE 36:2 | [M+Na]+ | 766.5357 | 9.62 | 0.0011±0.0007 | 8.6.10-4±4.0.10-4 | 0.76 | 0.153 |
| PE 36:2 | [M+H]+ | 744.5538 | 9.62 | 0.0077±0.0042 | 0.0063±0.0019 | 0.78 | 0.084 |
| PE P–36:2 | [M+H]+ | 728.5589 | 10.00 | 0.0081±0.0034 | 0.0076±0.0022 | 0.85 | 0.634 |
| PE P–36:2 | [M+Na]+ | 750.5408 | 10.00 | 0.0015±0.0008 | 0.0015±0.0006 | 0.87 | 0.748 |
| PE O-36:4 | [M+Na]+ | 748.5252 | 9.32 | 0.0030±0.0012 | 0.0062±0.0023 | 2.02 | <0.001 |
| PE P–36:4 | [M+H]+ | 724.5276 | 9.39 | 0.0293±0.0106 | 0.0271±0.0076 | 0.86 | 0.200 |
| PE P–36:4 | [M+Na]+ | 746.5095 | 9.39 | 0.0046±0.0019 | 0.0045±0.0013 | 0.90 | 0.496 |
| PE 38:2 | [M+Na]+ | 794.5670 | 9.72 | 3.7.10-4±2.2.10-4 | 3.4.10-4±1.9.10-4 | 0.66 | 0.409 |
| PE 38:2 | [M+Na]+ | 794.5670 | 10.11 | 3.9.10-4±3.2.10-4 | 5.5.10-4±4.7.10-4 | 1.73 | 0.097 |
| PE 38:3 | [M+Na]+ | 792.5514 | 9.72 | 0.0012±0.0006 | 0.0025±0.0009 | 0.94 | <0.001 |
| PE O–38:3 | [M+Na]+ | 778.5721 | 10.08 | 9.8.10-4±8.1.10-4 | 0.0015±0.0010 | 1.07 | 0.236 |
| PE P–38:3 | [M+H]+ | 754.5745 | 10.19 | 0.0023±0.0009 | 0.0024±0.0011 | 0.98 | 0.854 |
| PE P–38:3 | [M+Na]+ | 776.5565 | 10.19 | 0.0025±0.0014 | 0.0048±0.0020 | 1.35 | <0.001 |
| PE 38:4 | [M+Na]+ | 790.5357 | 9.09 | 4.6.10-5±3.3.10-5 | 5.7.10-5±4.0.10-5 | 0.71 | 0.377 |
| PE P–38:4 | [M+H]+ | 752.5589 | 9.97 | 0.0062±0.0033 | 0.0071±0.0027 | 0.86 | 0.607 |
| PE P–38:4 | [M+Na]+ | 774.5408 | 9.97 | 0.0011±0.0006 | 8.9.10-4±5.3.10-4 | 0.52 | 0.109 |
| PE 38:5 | [M+H]+ | 766.5381 | 9.14 | 0.0027±0.0015 | 0.0030±0.0010 | 0.85 | 0.326 |
| PE 38:5 | [M+H]+ | 766.5381 | 9.61 | 0.0011±0.0006 | 9.2.10-4±4.5.10-4 | 0.76 | 0.132 |
| PE P–38:5 | [M+H]+ | 750.5432 | 9.55 | 0.0131±0.0067 | 0.0101±0.0045 | 0.71 | 0.034 |
| PE 38:6 | [M+H]+ | 764.5225 | 8.90 | 8.8.10-4±5.6.10-4 | 0.0012±0.0006 | 1.11 | 0.082 |
| PE P-38:6 | [M+H]+ | 748.5276 | 9.33 | 0.0031±0.0013 | 0.0065±0.0024 | 2.02 | <0.001 |
| PE 40:5 | [M+H]+ | 794.5694 | 9.71 | 3.4.10-4±2.0.10-4 | 3.1.10-4±1.5.10-4 | 0.83 | 0.756 |
| PE P–40:5 | [M+H]+ | 778.5745 | 10.10 | 9.4.10-4±6.7.10-4 | 0.0012±0.0010 | 1.27 | 0.244 |
| PE 40:6 | [M+H]+ | 792.5538 | 9.71 | 0.0012±0.0006 | 0.0025±0.0009 | 0.96 | <0.001 |
| PE P–40:6 | [M+H]+ | 776.5589 | 10.08 | 0.0025±0.0013 | 0.0049±0.0023 | 1.35 | 0.001 |
| PE 40:7 | [M+H]+ | 790.5381 | 9.08 | 9.5.10-5±7.3.10-5 | 8.9.10-5±6.3.10-5 | 0.91 | 0.741 |
| PE P–40:7 | [M+H]+ | 774.5432 | 9.49 | 5.3.10-4±4.3.10-4 | 0.0011±0.0007 | 1.58 | 0.032 |
| PE P–40:7 | [M+H]+ | 774.5432 | 9.97 | 9.3.10-4±4.0.10-4 | 8.9.10-4±5.2.10-4 | 0.57 | 0.308 |
| PI 38:4 | [M+NH4]+ | 904.5910 | 8.06 | 0.0116±0.0022 | 0.0107±0.0026 | 0.96 | 0.566 |
| PS 36:1 | [M+Na]+ | 812.5412 | 8.15 | 0.0023±0.0008 | 0.0029±0.0011 | 1.23 | 0.075 |
| PS 36:1 | [M+H]+ | 790.5593 | 8.60 | 0.0262±0.0038 | 0.0256±0.0061 | 1.00 | 0.892 |
| PS 36:1 | [M+Na]+ | 812.5412 | 8.60 | 0.0053±0.0009 | 0.0052±0.0012 | 1.01 | 0.923 |
| PS 38:3 | [M+Na]+ | 836.5412 | 8.12 | 6.2.10-4±5.3.10-4 | 0.0014±0.0007 | 0.92 | <0.001 |
| PS 38:4 | [M+H]+ | 812.5436 | 8.14 | 0.0023±0.0008 | 0.0029±0.0011 | 1.23 | 0.075 |
| PS 38:4 | [M+Na]+ | 834.5256 | 8.14 | 7.4.10-5±3.6.10-5 | 9.2.10-5±6.6.10-5 | 1.08 | 0.823 |
| PS 38:4 | [M+H]+ | 812.5436 | 8.62 | 0.0052±0.0010 | 0.0053±0.0013 | 1.01 | 0.961 |
| PS 40:6 | [M+H]+ | 836.5436 | 8.11 | 6.0.10-4±5.1.10-4 | 0.0015±0.0007 | 0.95 | <0.001 |
| SM 36:1;O2 | [M+H]+ | 731.6062 | 9.01 | 0.0206±0.0092 | 0.0233±0.0075 | 0.94 | 0.930 |
| SM 36:4;O2 | [M+H]+ | 725.5592 | 8.10 | 0.0091±0.0018 | 0.0107±0.0021 | 1.12 | 0.086 |
| SM 38:5;O2 | [M+H]+ | 751.5749 | 8.34 | 1.0.10-4±0.7.10-4 | 8.4.10-5±6.3.10-5 | 0.52 | 0.515 |
| SM 40:4;O2 | [M+H]+ | 781.6218 | 9.80 | 0.0015±0.0005 | 0.0014±0.0004 | 0.97 | 0.801 |
| SM 42:2;O2 | [M+H]+ | 813.6844 | 10.57 | 0.0519±0.0154 | 0.0493±0.0112 | 1.00 | 0.946 |
| SM 44:2;O2 | [M+H]+ | 841.7157 | 11.15 | 0.0016±0.0007 | 0.0011±0.0005 | 0.67 | 0.020 |
| SM 44:3;O2 | [M+H]+ | 839.7001 | 11.28 | 1.8.10-4±1.1.10-4 | 1.3.10-4±0.9.10-4 | 0.44 | 0.093 |
| SPB 16:0;O3 | [M+H]+ | 290.2690 | 3.17 | 0.0501±0.0236 | 0.0500±0.0247 | 0.88 | 0.915 |
| SPB 18:0;O3 | [M+H]+ | 318.3003 | 3.57 | 0.0110±0.0054 | 0.0116±0.0060 | 0.82 | 0.923 |
| SPB 22:1;O3 | [M+H]+ | 372.3472 | 3.31 | 0.0081±0.0046 | 0.0069±0.0031 | 0.76 | 0.580 |

Table S5 The list of lipid species detected using Rn

| Analyte | Adduct | m/z | RT | NF2wt | NF2mt | NF2mt: NF2wt | p-value |
| --- | --- | --- | --- | --- | --- | --- | --- |
| Cer 34:1;O2 | [M+CH3COO]– | 596.5259 | 9.21 | 0.0136±0.0026 | 0.0140±0.0055 | 1.35 | 0.907 |
| Cer 35:1;O2 | [M+CH3COO]– | 610.5416 | 9.66 | 0.0012±0.0008 | 8.6.10-4±6.8.10-4 | 0.99 | 0.294 |
| Cer 35:1;O2 | [M+CH3COO]– | 610.5416 | 10.01 | 0.0033±0.0014 | 0.0024±0.0010 | 0.92 | 0.228 |
| Cer 36:1;O2 | [M+CH3COO]– | 624.5572 | 10.02 | 0.0100±0.0026 | 0.0063±0.0024 | 0.90 | 0.038 |
| Cer 36:2;O2 | [M+CH3COO]– | 622.5416 | 9.46 | 6.8.10-4±4.0.10-4 | 4.6.10-4±3.6.10-4 | 1.01 | 0.180 |
| Cer 42:2;O2 | [M+CH3COO]– | 706.6355 | 11.35 | 0.0306±0.0064 | 0.0226±0.0058 | 1.07 | 0.025 |
| Cer 42:3;O2 | [M+CH3COO]– | 704.6198 | 10.95 | 0.0041±0.0012 | 0.0029±0.0009 | 1.27 | 0.080 |
| PC 32:0 | [M+CH3COO]– | 792.5760 | 9.07 | 0.0329±0.0067 | 0.0320±0.0066 | 0.94 | 0.553 |
| PC 32:1 | [M+CH3COO]– | 790.5604 | 8.51 | 0.0119±0.0023 | 0.0125±0.0019 | 1.05 | 0.448 |
| PC 34:1 | [M+CH3COO]– | 818.5917 | 9.29 | 0.1400±0.0149 | 0.1499±0.0157 | 1.06 | 0.064 |
| PC 34:2 | [M+CH3COO]– | 816.5760 | 8.77 | 0.0320±0.0121 | 0.0198±0.0072 | 0.68 | 0.003 |
| PC 36:1 | [M+CH3COO]– | 846.6230 | 10.04 | 0.0407±0.0054 | 0.0456±0.0089 | 1.09 | 0.074 |
| PC 36:2 | [M+CH3COO]– | 844.6073 | 9.51 | 0.0320±0.0091 | 0.0246±0.0060 | 0.84 | 0.028 |
| PE 34:1 | [M-H]– | 716.5236 | 9.42 | 0.0201±0.0043 | 0.0219±0.0032 | 0.99 | 0.712 |
| PE P–34:1 | [M-H]– | 700.5287 | 9.85 | 0.0625±0.0191 | 0.0882±0.0159 | 1.33 | <0.001 |
| PE 36:1 | [M-H]– | 744.5549 | 10.16 | 0.0379±0.0055 | 0.0347±0.0042 | 0.91 | 0.066 |
| PE P–36:1 | [M-H]– | 728.5600 | 10.51 | 0.0308±0.0140 | 0.0335±0.0063 | 0.90 | 0.600 |
| PE 36:2 | [M-H]– | 742.5392 | 9.60 | 0.0130±0.0039 | 0.0098±0.0034 | 0.78 | 0.010 |
| PE P–36:2 | [M-H]– | 726.5443 | 9.98 | 0.0159±0.0050 | 0.0160±0.0032 | 0.86 | 0.398 |
| PE P–36:4 | [M-H]– | 722.5130 | 9.37 | 0.0466±0.0150 | 0.0502±0.0144 | 0.88 | 0.331 |
| PE P–38:4 | [M-H]– | 750.5443 | 9.95 | 0.0155±0.0060 | 0.0160±0.0063 | 0.74 | 0.634 |
| PE 38:5 | [M-H]– | 764.5236 | 9.11 | 0.0049±0.0020 | 0.0044±0.0018 | 0.90 | 0.398 |
| PE O–38:6 | [M-H]– | 748.5287 | 9.51 | 0.0243±0.0105 | 0.0167±0.0079 | 0.67 | 0.009 |
| PE P–38:6 | [M-H]– | 746.5130 | 9.33 | 0.0048±0.0024 | 0.0117±0.0043 | 2.14 | <0.001 |
| PE 40:4 | [M-H]– | 794.5705 | 10.26 | 0.0027±0.0020 | 0.0027±0.0012 | 0.73 | 0.961 |
| PE 40:5 | [M-H]– | 792.5549 | 10.09 | 0.0010±0.0006 | 0.0014±0.0010 | 1.45 | 0.111 |
| PE O–40:5 | [M-H]– | 778.5756 | 10.57 | 0.0064±0.0040 | 0.0054±0.0031 | 0.90 | 0.984 |
| PE P–40:5 | [M-H]– | 776.5600 | 10.07 | 0.0016±0.0010 | 0.0025±0.0016 | 1.19 | 0.221 |
| PE P–40:5 | [M-H]– | 776.5600 | 10.44 | 0.0012±0.0008 | 0.0015±0.0013 | 1.67 | 0.248 |
| PE 40:6 | [M-H]– | 790.5392 | 9.69 | 0.0015±0.0011 | 0.0035±0.0014 | 0.90 | <0.001 |
| PE P–40:6 | [M-H]– | 774.5443 | 10.06 | 0.0046±0.0028 | 0.0102±0.0038 | 1.45 | <0.001 |
| PE P–40:7 | [M-H]– | 772.5287 | 9.46 | 6.0.10-4±5.3.10-4 | 0.0013±0.0010 | 1.52 | 0.113 |
| PI 38:4 | [M-H]– | 885.5499 | 8.02 | 0.0346±0.0053 | 0.0348±0.0064 | 0.99 | 0.961 |
| PS 36:1 | [M-H]– | 788.5447 | 8.55 | 0.0440±0.0054 | 0.0426±0.0079 | 0.97 | 0.823 |
| PS 36:2 | [M-H]– | 786.5291 | 7.93 | 0.0026±0.0014 | 0.0014±0.0010 | 0.58 | 0.006 |
| PS 40:6 | [M-H]– | 834.5291 | 8.04 | 7.5.10-4±6.1.10-4 | 0.0017±0.0008 | 0.92 | 0.002 |
| SM 34:1;O2 | [M+CH3COO]– | 761.5814 | 8.08 | 0.0365±0.0063 | 0.0429±0.0058 | 1.07 | 0.132 |
| SM 36:1;O2 | [M+CH3COO]– | 789.6127 | 8.99 | 0.0169±0.0058 | 0.0194±0.0051 | 0.94 | 0.861 |
| SM 40:1;O2 | [M+CH3COO]– | 845.6753 | 10.50 | 0.0295±0.0054 | 0.0345±0.0074 | 1.16 | 0.062 |
| SM 42:1;O2 | [M+CH3COO]– | 873.7066 | 10.77 | 0.0047±0.0019 | 0.0023±0.0011 | 0.53 | <0.001 |
| SM 42:1;O2 | [M+CH3COO]– | 873.7066 | 11.08 | 0.0345±0.0078 | 0.0431±0.0115 | 1.15 | 0.105 |
| SM 42:2;O2 | [M+CH3COO]– | 871.6910 | 10.56 | 0.0717±0.0103 | 0.0669±0.0089 | 0.93 | 0.248 |

Table S6 Descriptive statistics for the metabolites that were found to be most important using the PLS-DA with the target projection approach. The median values ± MAD (median absolute deviation) of the pairwise models are only listed for those metabolites that are important.

| **Metabolites** | **Median contents of metabolites ±MAD** | | **Kruskal-Wallis test**  **(p-value)** |
| --- | --- | --- | --- |
| **NF2wt** | **NF2mt** |
| **Hp** | | | |
| LPC 18:3 | 0.00041 ± 0.00017 | 0.00027 ± 0.00011 | 0.009 |
| LPC 18:3 | 0.0032 ± 0.0014 | 0.0016 ± 0.0001 | 0.002 |
| PC 35:1 | 0.0015 ± 0.0003 | 0.0014 ± 0.0002 | 0.317 |
| PC P 36:3 | 0.00002 ± 0.00001 | 0.00004 ± 0.00002 | 0.001 |
| PC 38:4 | 0.0085 ± 0.0021 | 0.0084 ± 0.0021 | 0.214 |
| PC P 39:1 | 4.4.10-7 ± 1.8.10-7 | 4.9.10-7 ± 1.9.10-7 | 0.945 |
| PS 40:7 | 0.00046 ± 0.00012 | 0.00058 ± 0.00019 | 0.371 |
| SPB 14:0;O3 | 0.0042 ± 0.0023 | 0.0034 ± 0.0025 | 0.923 |
| SPB 18:0;O3 | 0.0024 ± 0.0017 | 0.0022 ± 0.0014 | 0.690 |
|  |  |  |  |
| **Hn** |  |  |  |
| PE 38:1 | 0.00048 ± 0.00032 | 0.00015 ± 0.00014 | 0.002 |
| PE P 38:6 | 0.0101 ± 0.0032 | 0.0235 ± 0.0068 | <0.001 |
| PE O-40:6 | 0.0050 ± 0.0026 | 0.0094 ± 0.0027 | 0.001 |
| PE P-40:6 | 0.0075 ± 0.0030 | 0.0147 ± 0.0041 | <0.001 |
| PS 36:1 | 0.1361 ± 0.0316 | 0.1218 ± 0.0278 | 0.351 |
|  |  |  |  |
| **Rp** |  |  |  |
| HexCer 43:2;O2 | 1.5.10-5 ± 8.2.10-6 | 1.1.10-5 ± 4.7.10-6 | 0.210 |
| HexCer 43:2+pO | 5.7.10-5 ± 3.8.10-5 | 3.4.10-5 ± 2.2.10-5 | 0.033 |
| HexCer 44:2;O2 | 6.8.10-5 ± 5.9.10-5 | 4.5.10-5 ± 3.5.10-5 | 0.064 |
| SM 38:5;O2 | 1.0.10-4 ± 7.4.10-5 | 8.4.10-5 ± 6.3.10-5 | 0.515 |
| PC P-34:1 | 6.2.10-4 ± 3.9.10-4 | 0.0015 ± 4.5.10-4 | <0.001 |
| PC P-34:1 | 0.0039 ± 0.0020 | 0.0087 ± 0.0019 | <0.001 |
| PC P-36:4 | 6.6.10-4 ± 3.8.10-4 | 0.0015 ± 3.8.10-4 | <0.001 |
| PE 38:4 | 4.6.10-5 ± 3.3.10-5 | 5.7.10-5 ± 4.0.10-5 | 0.377 |
|  |  |  |  |
| **Rn** |  |  |  |
| PE P 38:6 | 0.0048 ± 0.0024 | 0.0117 ± 0.0043 | <0.001 |
| PE 40:5 | 0.0010 ± 0.0006 | 0.0014 ± 0.0010 | 0.111 |
| PE P 40:5 | 0.0012 ± 0.0008 | 0.0015 ± 0.0013 | 0.248 |
| PE P 40:7 | 0.0006 ± 0.0005 | 0.0013 ± 0.0001 | 0.113 |
| PS 36:2 | 0.0026 ± 0.0014 | 0.0014 ± 0.0010 | 0.006 |
| PC 34:1 | 0.1400 ± 0.0149 | 0.1499 ± 0.0157 | 0.064 |
| PE P 36:1 | 0.0308 ± 0.0140 | 0.0335 ± 0.0063 | 0.600 |
| PE P 36:2 | 0.0159 ± 0.0050 | 0.0160 ± 0.0032 | 0.398 |
| PE P 38:6 | 0.0048 ± 0.0024 | 0.0117 ± 0.0043 | <0.001 |
| PE 40:5 | 0.0010 ± 0.0006 | 0.0014 ± 0.0010 | 0.111 |
| PE P 40:5 | 0.0012 ± 0.0008 | 0.0015 ± 0.0013 | 0.248 |
| PE P 40:6 | 0.0046 ± 0.0028 | 0.0102 ±0.0038 | <0.001 |
| PE P 40:7 | 0.0006 ± 0.0005 | 0.0013 ± 0.0001 | 0.113 |
| PS 36:1 | 0.0440 ± 0.0054 | 0.0426 ± 0.0079 | 0.823 |
| PS 36:2 | 0.0026 ± 0.0014 | 0.0014 ± 0.0010 | 0.006 |
| SM 34:1, O2 | 0.0365 ± 0.0063 | 0.0429 ± 0.0058 | 0.132 |
